# Supplementary material for: Electrochemical and imaging evaluations of electrochemically activated screen-printed gold electrodes
Source: Royal Society of Chemistry journal article supplement (doi:10.1039/d4an00990h), 2024-01-01
Supplement: d4an00990h1.pdf [file d4an00990h1.pdf]

## Electrochemical and imaging evaluations of electrochemically activated screen-printed gold electrodes

Nor Dyana Zakaria<sup>a</sup>, Ibrahim Luqman Salih<sup>b</sup>, Hairul Hisham Hamzah<sup>c,e\*</sup>, Turgut Sönmez<sup>d</sup>, Muhamad Huzaifah Omar<sup>e</sup>, Noorhashimah Mohamad Nor<sup>f</sup>, Khairunisak Abdul Razak<sup>a,f</sup>, Venugopal Balakrishnan<sup>a</sup>

a. Institute for Research in Molecular Medicine, (INFORMM), Universiti Sains Malaysia (USM), 11800, Gelugor, Penang, Malaysia.

b. Department of Pharmacy, Raparin Technical and Vocational Institute, Rania, Sulaymaniyah, Kurdistan Region 46012, Iraq.

c. School of Health and Life Sciences, Teesside University, Middlesbrough, TS1 3BX, Tees Valley, England, UK.

d. Department of Chemistry, Karabuk University, 78050 Karabuk, Turkey

e. School of Chemical Sciences, Universiti Sains Malaysia (USM), 11800, Gelugor, Penang, Malaysia

f. School of Materials and Mineral Resources Engineering, Engineering Campus, Universiti Sains Malaysia (USM), 14300, Nibong Tebal, Penang, Malaysia.

\*Corresponding author: [H.Hamzah@tees.ac.uk](mailto:H.Hamzah@tees.ac.uk) or [hishamsoton@gmail.com](mailto:hishamsoton@gmail.com)

### Equations for calculating the roughness factor ( $\rho$ )

$$\text{Charge } (Q_{real}) = \frac{\text{Intergarted area under reduction peak}}{\text{Scan rate of CV}}$$

Eq.1

$$\text{Real electroactive surface } (A_{real}) = \frac{Q_{real}}{Q_{theoretical}} \quad \text{Eq.2}$$

$Q_{theoretical}$  = Theoretical charge density of Au as  $390 \mu\text{C cm}^{-2}$ .

$$\text{Roughnes factor } (\rho) = \frac{A_{Real}}{A_{Geo}} \quad \text{Eq.3}$$

$A_{\text{geo}}$  = Geometric surface area of the SPGE (0.11 cm<sup>2</sup>)

| Parameter        | Value           | Fitting error / % |
|------------------|-----------------|-------------------|
| $R_u$            | 34.04 $\Omega$  | 0.56              |
| $R_{\text{ct1}}$ | 111.17 $\Omega$ | 10.15             |
| $R_{\text{ct2}}$ | 584.13 $\Omega$ | 0.747             |

**Table S1: Resistance, fitting error, and convergence fit values for the unactivated SPGE, obtained from the fitted Nyquist and Bode plots using an equivalent model circuit proposed in Figure 2D.**

\

| Convergence fit value (x <sup>2</sup> ) = 0.0098 | Parameter        | Value          | Fitting error / % |
|--------------------------------------------------|------------------|----------------|-------------------|
|                                                  | $R_u$            | 29.45 $\Omega$ | 1.66              |
|                                                  | $R_{\text{ct1}}$ | 10.78 $\Omega$ | 3.44              |
|                                                  | $R_{\text{ct2}}$ | 16.83 $\Omega$ | 9.00              |

**Table S2: Resistance, fitting error, and convergence fit values for the activated SPGE, obtained from the fitted Nyquist and Bode plots using an equivalent model circuit proposed in Figure 2D.**

Convergence fit value (x<sup>2</sup>) = 0.0026

**Equations used for obtaining capacitance,  $A_{\text{real}}$ , and roughness factor values**

$$C_{dl} = \frac{i_a - i_c}{2V} \quad \text{Eq.}$$

$$i_c = A_{Real} C_{dl} \frac{\delta_E}{\delta_t} = A_{real} C_{dl} \nu \quad \text{Eq. 5}$$

$$\rho = \frac{A_{Real}}{A_{Geo}} \quad \text{Eq. 6}$$

$C_{dl}$  = Double layer capacitance  
 $i_a$  = Anodic capacitive current  
 $i_c$  = Cathodic capacitive current  
 $\nu$  = CV scan rate  
 $A_{real}$  = Real electrode surface area  
 $A_{geo}$  = The geometric electrode surface area  
 $\rho$  = Roughness factor

**The equation used for calculating the heterogeneous electron-transfer rate constant**

$$k^o = \frac{RT}{R_{ct} F^2 n A C} \quad \text{Eq. 7}$$

$k^o$  = Heterogeneous electron-transfer rate constant

$R$  = Gas constant

$T$  = Temperature in K at room temperature

$R_{ct}$  = Charge transfer resistance obtained from the fitted Nyquist plot

$F$  = Faradaic constant

$C$  =  $[\text{Fe}(\text{CN})_6]^{3-/4-}$  solution in  $\text{mol cm}^{-3}$

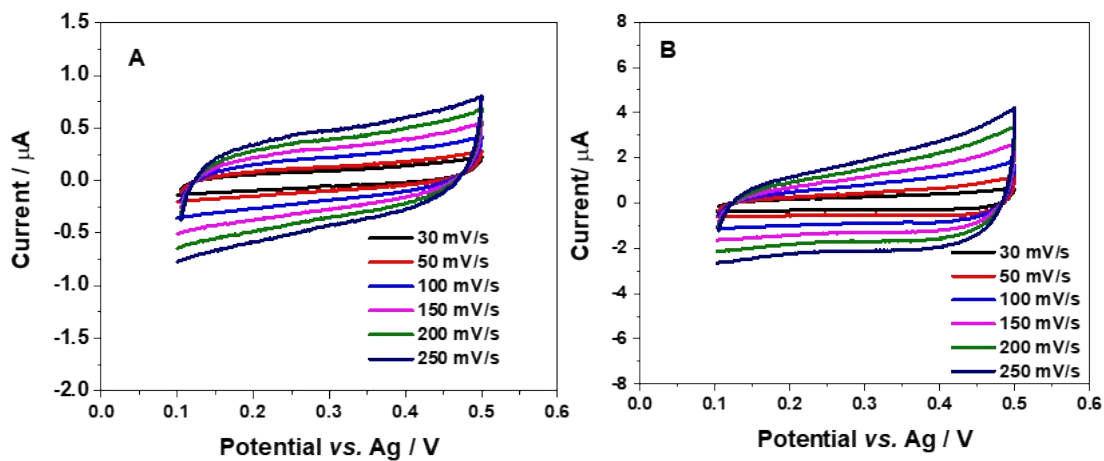

**Figure S1: A and B) Cyclic voltammograms for unactivated SPGE and activated SPGE at scan rates of 0.03, 0.05, 0.1, 0.15, 0.2 and 0.25 Vs<sup>-1</sup>, respectively. The CV measurements were carried out in a 0.1 M KCl solution.**

**Table S3: Capacitance,  $A_{\text{real}}$ , and roughness factor values for unactivated and activated SPGEs, calculated from cyclic voltammetric measurements as shown in Figures S1A, S1B, and 3B.**

| Parameters                         | E8          |           | E9          |           | E14         |           |
|------------------------------------|-------------|-----------|-------------|-----------|-------------|-----------|
|                                    | Unactivated | Activated | Unactivated | Activated | Unactivated | Activated |
| Capacitance (slope)/ $\mu\text{F}$ | 1.75        | 8.06      | 1.64        | 8.50      | 1.59        | 5.32      |
| $A_{\text{real}}/ \text{cm}^2$     | 1.19        | 1.20      | 1.20        | 1.12      | 1.12        | 1.20      |
| Roughness factor                   | 10.8        | 10.9      | 10.9        | 10.2      | 10.2        | 10.9      |

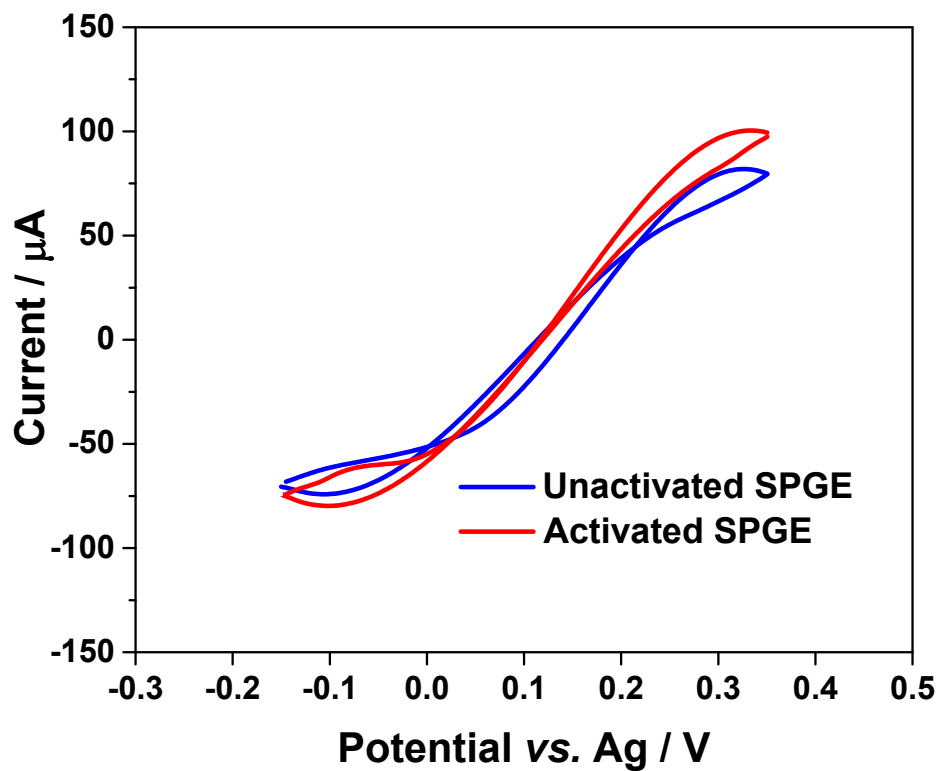

**Figure S2:** Created baseline for capacitive currents of unactivated SPGE and activated SPGE in a mixture of 10 mM ferrocyanide/ferricyanide at 100 mV/s. The created baselines for both electrodes were obtained from CV responses shown in Figure 2A. The baselines were created using Origin software.

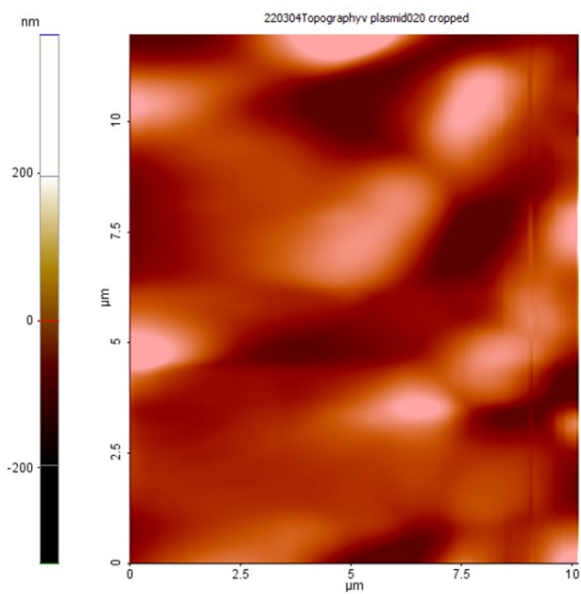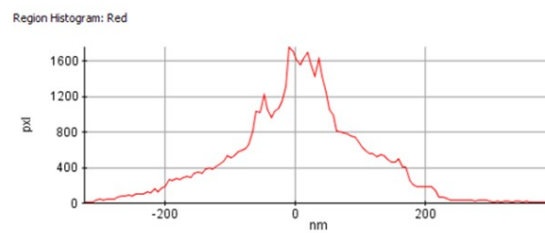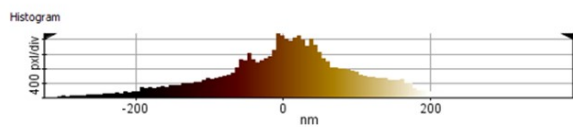

Statistics

| Region                                  | Min( $\mu\text{m}$ ) | Max( $\mu\text{m}$ ) | Mid( $\mu\text{m}$ ) | Mean( $\mu\text{m}$ ) | Rpv( $\mu\text{m}$ ) | Rq( $\mu\text{m}$ ) | Ra( $\mu\text{m}$ ) | Rz( $\mu\text{m}$ ) | Rsk   | Rku   |
|-----------------------------------------|----------------------|----------------------|----------------------|-----------------------|----------------------|---------------------|---------------------|---------------------|-------|-------|
| <input checked="" type="checkbox"/> Red | -0.330               | 0.387                | 0.029                | 0.000                 | 0.717                | 0.100               | 0.076               | 0.690               | 0.140 | 3.447 |

**Figure S3: AFM topographical analysis for unactivated SPGE. Analysis was made at 10 x 12  $\mu\text{M}$ .**

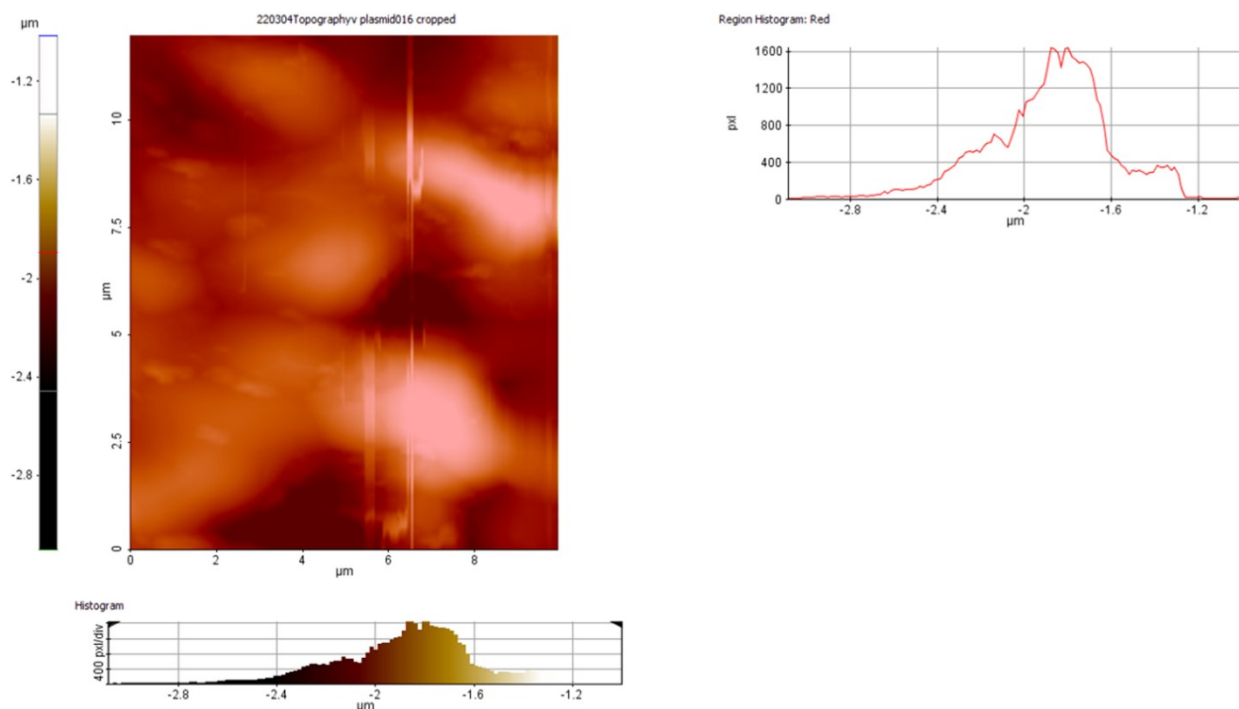

Statistics

| Region                                  | Min(μm) | Max(μm) | Mid(μm) | Mean(μm) | Rpv(μm) | Rq(μm) | Ra(μm) | Rz(μm) | Rsk   | Rku   |
|-----------------------------------------|---------|---------|---------|----------|---------|--------|--------|--------|-------|-------|
| <input checked="" type="checkbox"/> Red | -3.102  | -1.016  | -2.059  | -1.896   | 2.087   | 0.286  | 0.218  | 2.066  | 0.497 | 3.799 |

Figure S4: AFM topographical analysis for activated SPGE. Analysis was made at 10 x 12 μM.

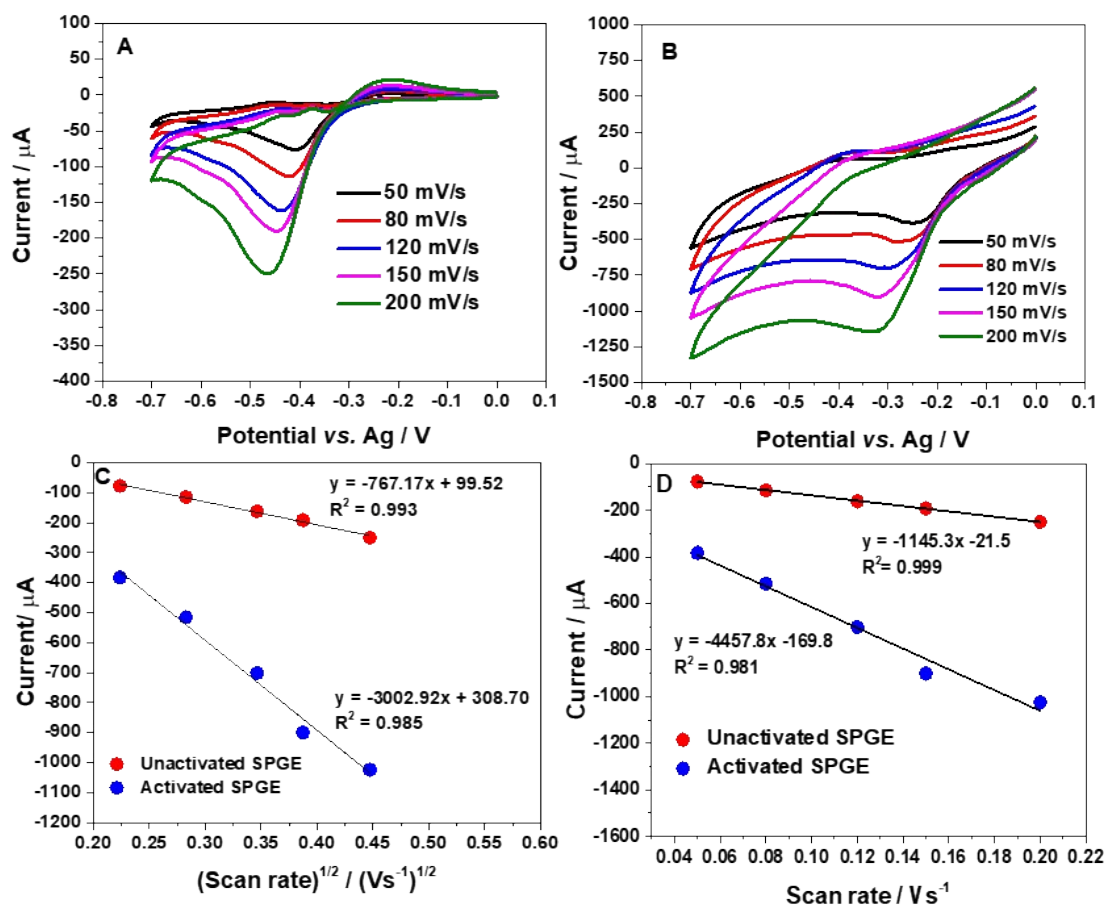

**Figure S5: (A) Cyclic voltammograms of unactivated SPGE at different scan rates of 0.05, 0.08, 0.12, 0.15, and 0.2 Vs<sup>-1</sup>, measured in 0.1 M KCl at saturated O<sub>2</sub>. (B) Cyclic voltammograms of activated SPGE at different scan rates of 0.05, 0.08, 0.12, 0.15, and 0.2 Vs<sup>-1</sup>, measured in 0.1 M KCl at saturated O<sub>2</sub>. (C) plots of cathodic peak currents versus square root of scan rates ( $v^{1/2}$ ) and (D) plots of cathodic peak currents versus different scan rates ( $v$ ).**
